# Supplementary material for: Influence of Parental Healthy-Eating Attitudes and Nutritional Knowledge on Nutritional Adequacy and Diet Quality among Preschoolers: The SENDO Project
Source: PubMed Central journal article supplement (PMC6316633; doi:10.3390/nu10121875), 2018-12-03
Supplement: nutrients-10-01875-s001.pdf [file nutrients-10-01875-s001.pdf]

**Table S1.** Criteria used to calculate nutrition knowledge score.

| <b>How often do you think your child should consume these foods to follow a healthy diet?</b> | <b>Never or almost never</b> | <b>1–3 times/month</b> | <b>1/week</b> | <b>2–4 times/week</b> | <b>5–6 times/week</b> | <b>1/day</b> | <b>2–3 times/day</b> | <b>4–6 times/day</b> | <b>More 6 times/day</b> |
|-----------------------------------------------------------------------------------------------|------------------------------|------------------------|---------------|-----------------------|-----------------------|--------------|----------------------|----------------------|-------------------------|
| Dairy                                                                                         | 0                            | 0                      | 0             | 0                     | 0                     | 0            | 1                    | 0                    | 0                       |
| Fruit                                                                                         | 0                            | 0                      | 0             | 0                     | 0                     | 0            | 1                    | 0                    | 0                       |
| Vegetables                                                                                    | 0                            | 0                      | 0             | 0                     | 0                     | 0            | 1                    | 0                    | 0                       |
| Cereals and grains                                                                            | 0                            | 0                      | 0             | 0                     | 0                     | 0            | 0                    | 1                    | 0                       |
| Meat                                                                                          | 0                            | 0                      | 0             | 1                     | 0                     | 0            | 0                    | 0                    | 0                       |
| Fish                                                                                          | 0                            | 0                      | 0             | 1                     | 0                     | 0            | 0                    | 0                    | 0                       |
| Eggs                                                                                          | 0                            | 0                      | 0             | 1                     | 0                     | 0            | 0                    | 0                    | 0                       |
| Pulses                                                                                        | 0                            | 0                      | 0             | 1                     | 0                     | 0            | 0                    | 0                    | 0                       |
| Nuts                                                                                          | 0                            | 0                      | 0             | 1                     | 1                     | 0            | 0                    | 0                    | 0                       |
| Olive oil                                                                                     | 0                            | 0                      | 0             | 0                     | 0                     | 0            | 1                    | 1                    | 0                       |

**Table S2.** Criteria used to calculate healthy-eating attitudes score.

| <b>I try my child to eat more ...</b> | <b>NO</b> | <b>YES</b> |
|---------------------------------------|-----------|------------|
| Fruit?                                | 0         | 1          |
| Fiber?                                | 0         | 1          |
| Vegetables?                           | 0         | 1          |
| Fish?                                 | 0         | 1          |
| Avoid butter consumption?             | 0         | 1          |
| Reduce fat intake?                    | 0         | 1          |
| Reduce meat consumption?              | 0         | 1          |
| Reduce eating sweets and pastries?    | 0         | 1          |
| <b>Total (min/max)</b>                | <b>0</b>  | <b>8</b>   |

**Table S3.** KIDMED test with the original punctuation.

| <b>KIDMED test (Mediterranean Diet Quality Index)</b> | <b>Scoring</b> |
|-------------------------------------------------------|----------------|
| Fruit or fruit juice daily                            | +1             |
| Second serving of fruit daily                         | +1             |
| Fresh or cooked vegetables daily                      | +1             |
| Fresh or cooked vegetables > 1/day                    | +1             |
| Regular fish consumption (at least 2–3/week)          | +1             |
| >1/week fast-food (hamburger) restaurant              | -1             |
| Pulses > 1/week                                       | +1             |
| Pasta or rice almost daily (≥5 days/week)             | +1             |
| Cereal or cereal product for breakfast                | +1             |
| Regular nut consumption (at least 2–3/week)           | +1             |
| Use of olive oil at home                              | +1             |
| No breakfast                                          | -1             |
| Dairy product for breakfast                           | +1             |
| Commercially baked goods or pastries for breakfast    | -1             |
| Two yoghurts and/or 40 g cheese daily                 | +1             |
| Sweets and candy several times a day                  | -1             |
